# Supplementary figures and images for: Enhancing Detection of SSMVEP Induced by Action Observation Stimuli Based on Task-Related Component Analysis
Source: MDPI journal article supplement (doi:10.3390/s21165269), 2021-08-04

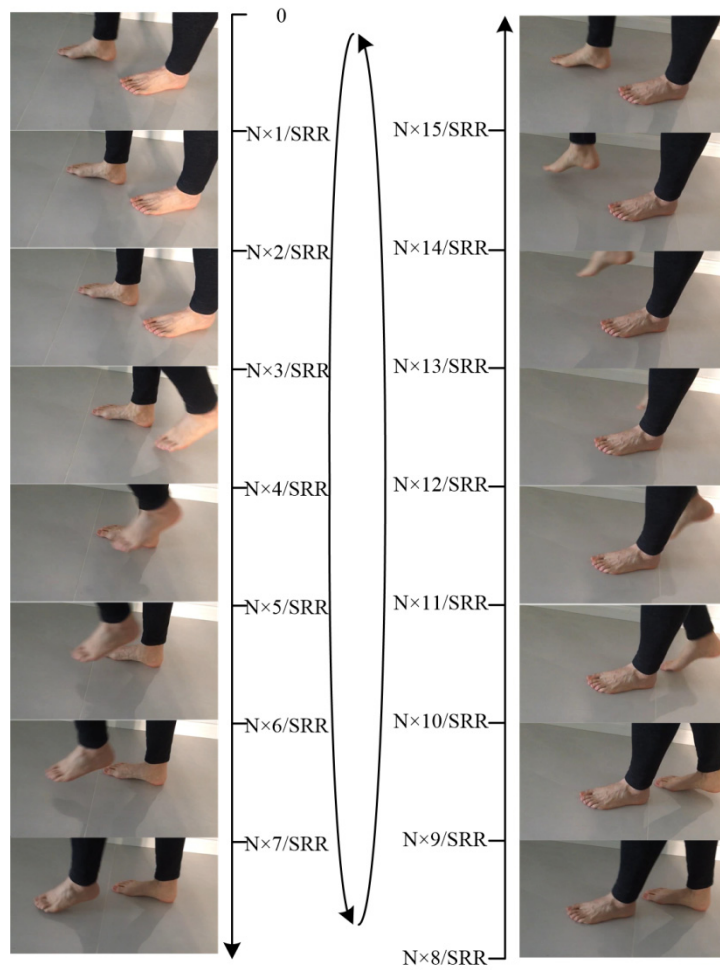

**Figure S1.** Generation of the gaiting stimulus.

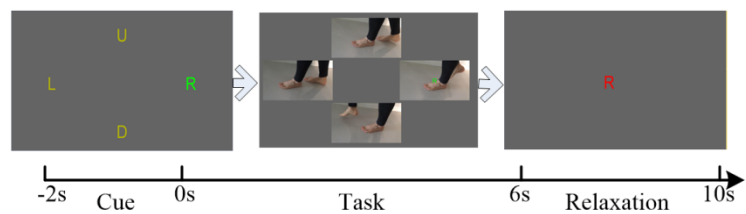

**Figure S2.** Illustration of the experiment protocol.

Supplement: s1 [file s1]
